# Supplementary material
Source: publisher site journal article supplement (https://www.dovepress.com/article/273145)
Supplement: Supplementary file 1 [file get_supplementary_file.php]

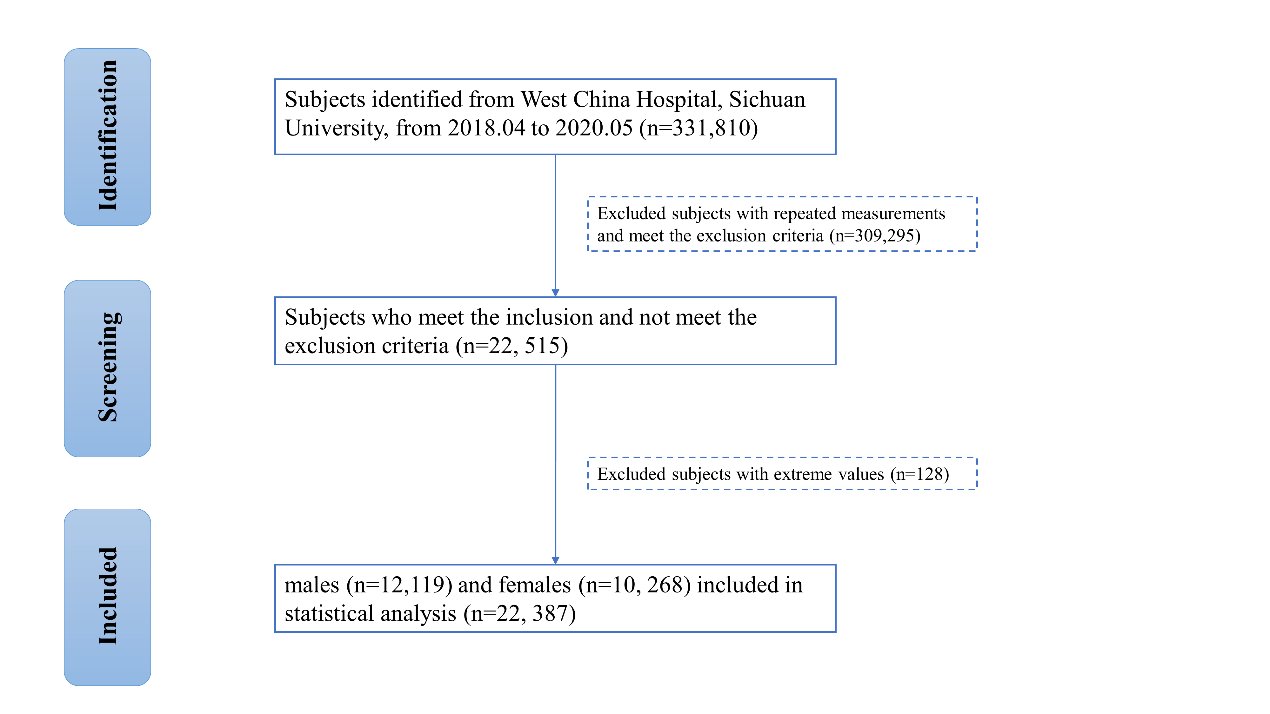


**Fig.S1** **Data enrollment process.** According to the inclusion and exclusion, 22, 387 subjects were included for statistics analysis.

**Fig. S2 The normality test for serum 25-(OH) D, PTH and TCa.** **(A, B)** Histogram and Q-Q plot of 25-(OH) D; **(C, D)** Histogram and Q-Q plot of PTH (C&D); **(E, F)** Histogram and Q-Q plot of TCa


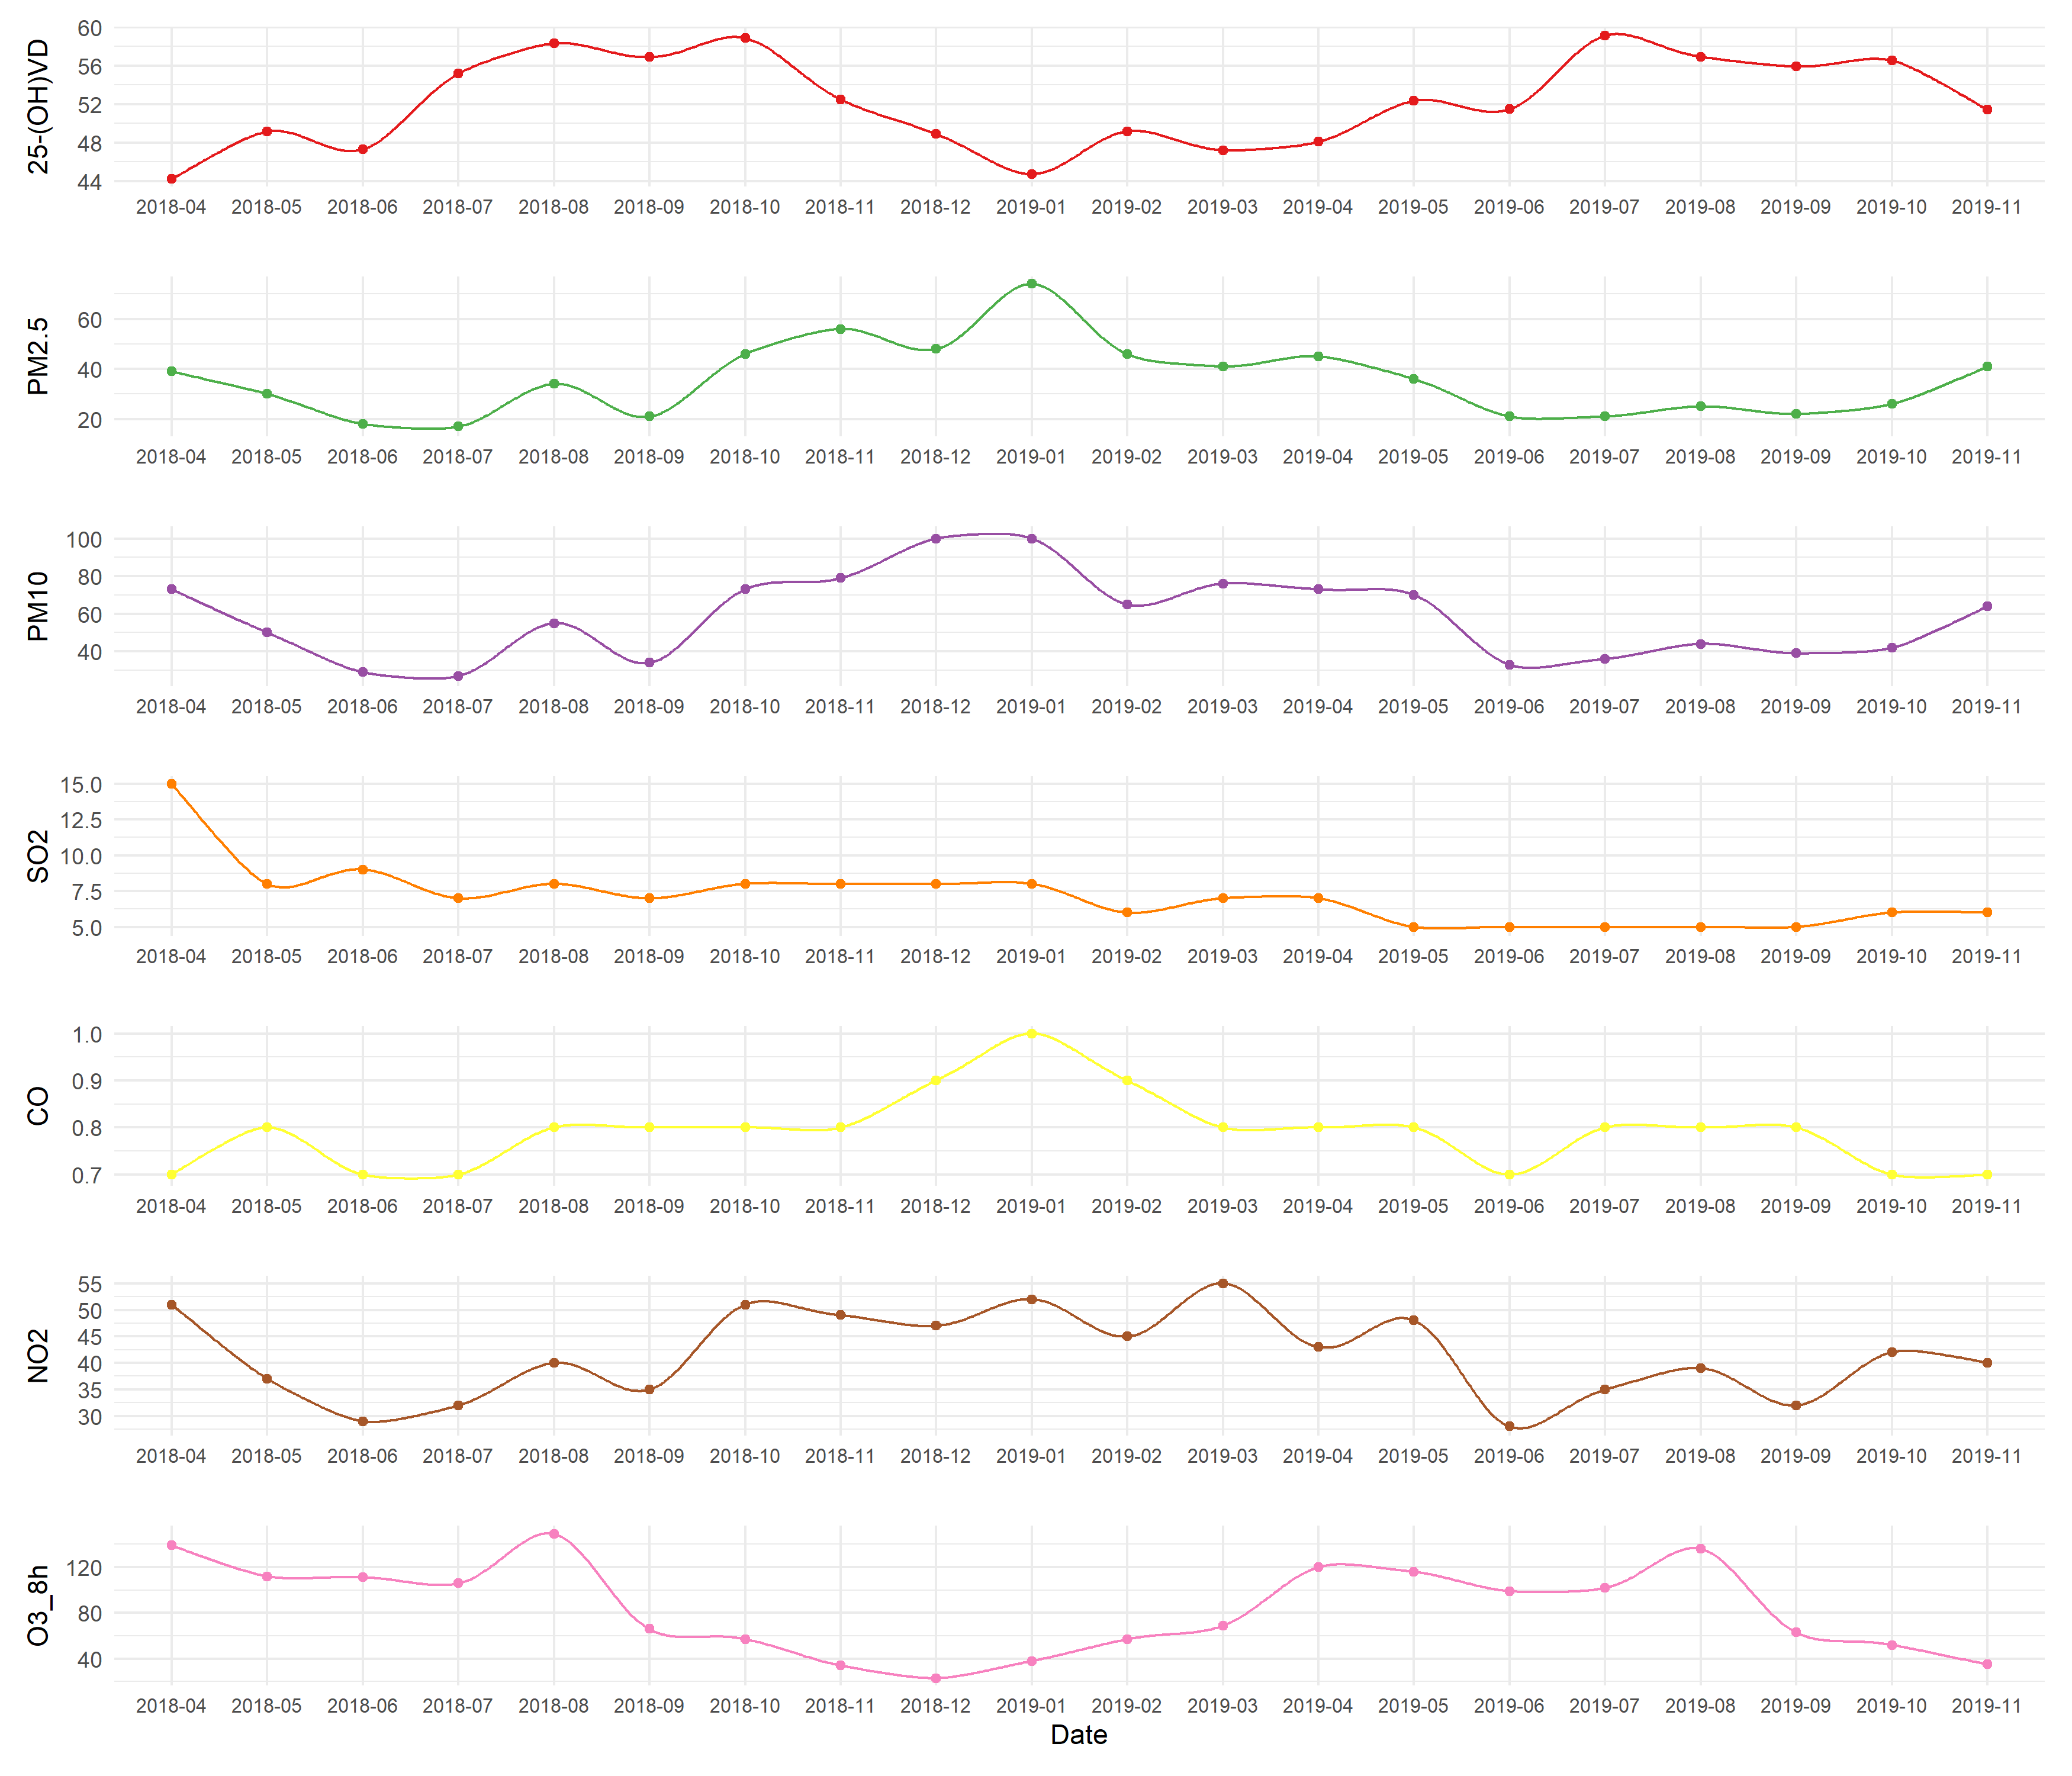


**Fig.S3 The time variation curve of specific pollutants and vitamin D levels.**

**Table S1.** Air quality classification standard1,2

| AQI | Pollutant concentrations (μg/m3) and CO (mg/m3) | | | | | | Category | Description |
| --- | --- | --- | --- | --- | --- | --- | --- | --- |
| PM2.5 | PM10 | SO2 | NO2 | O3 | CO |
| 0~50 | 0~35 | 0~50 | 0~50 | 0~40 | 0~100 | 0~2 | Level 1 | Excellent |
| 51~100 | 36~75 | 51~150 | 51~150 | 41~80 | 101~160 | 3~4 | Level 2 | Good |
| 101~150 | 76~115 | 151~250 | 151~475 | 81~180 | 161~215 | 5~14 | Level 3 | Light pollution |
| 151~200 | 116~150 | 251~350 | 576~800 | 181~280 | 216~265 | 15~24 | Level 4 | Moderate pollution |
| 201~300 | 151~250 | 351~420 | 801~1600 | 281~565 | 266~800 | 25~36 | Level 5 | Serious pollution |
| ＞300 | ＞251 | ＞421 | ＞1600 | ＞566 | ＞801 | ＞37 | Level 6 | Very severe pollution |

1G K, A C, PA K. Development of an aggregate Air Quality Index for an urban Mediterranean agglomeration: relation to potential health effects. Environment international. 2007;33(5):670-676.

2DM S, RT B, M S-D, O B, HH S, V E. A new multipollutant, no-threshold air quality health index based on short-term associations observed in daily time-series analyses. Journal of the Air & Waste Management Association (1995). 2008;58(3):435-450.
